## 1 Superfast Evolution of Multi-drug Antibiotic Resistance

2  
3 Le Zhang<sup>1,†</sup>, Qian Su<sup>1,†</sup>, Yunpeng Guan<sup>1,2</sup>, Yuen Yee Cheng<sup>3</sup>, Nural Cokcetin<sup>4</sup>, Amy  
4 Bottomley<sup>4</sup>, Andrew Robinson<sup>5</sup>, Elizabeth Harry<sup>4</sup>, Antoine van Oijen<sup>5</sup>, Dayong Jin<sup>1,2\*</sup>

5  
6 <sup>1</sup>Institute for biomedical materials and devices, University of Technology Sydney, Ultimo,  
7 Australia.

8 <sup>2</sup>Department of biomedical engineering, Southern University of Science and Technology,  
9 Shenzhen, China.

10 <sup>3</sup>Asbestos diseases research institute, Concord, Australia.

11 <sup>4</sup>Three institute, University of Technology Sydney, Ultimo, Australia.

12 <sup>5</sup>School of chemistry and molecular bioscience, University of Wollongong, Wollongong,  
13 Australia.

14 †These authors contributed equally to this work

15 \*Corresponding author. Email: [dayong.jin@uts.edu.au](mailto:dayong.jin@uts.edu.au)

16  
17 **In the presence of antibiotics, SOS response supports bacteria survival by activating the**  
18 **DNA repair system. Here, we find that the reduction of the SOS response by deletion of**  
19 **its master regulator *recA* can cause an even superfast establishment of antibiotic**  
20 **resistance (20-fold MIC) in *Escherichia coli*, which only takes 8 hours after a single**  
21 **exposure to ampicillin. And the gene *acrB* mutations were observed with a multi-drug**  
22 **resistance to other classes of antibiotics. This process is accompanied with the rapidly**  
23 **occurring DNA mutations, but orthogonal to the SOS response.**

24  
25 Homologous recombination (HR) is the process responsible for maintaining genome stability  
26 in all living organisms; it is particularly important for repairing DNA double-strand breaks,  
27 which becomes the central for cancer treatment (1). A key protein of the HR pathway in  
28 eukaryotic cells is Rad51 (2, 3). Rad51 belongs to the *recA/RAD51* gene family that arose from  
29 a gene duplication of the archaeal RadA protein and is highly conserved throughout evolution.  
30 Many recent findings have indicated Rad51 protein is overexpressed in a variety of tumours,  
31 and the high expression of Rad51 is related to poor prognosis (4). Therefore, HR inhibition of  
32 Rad51 may provide another mechanism of therapeutic target for the chemosensitization and  
33 radiosensitization of cancer. Some Rad51 inhibitors have being assessed in clinical trials on its

34 safety, tolerability and pharmacokinetics, including the drug CYT-0851 (5). However, in  
35 prokaryotic cells, RecA is the central protein that is loaded onto the ssDNA tails and forms a  
36 contiguous nucleoprotein filament and serves as a master regulator in the SOS response system  
37 (2, 3). Although RecA and Rad51 share only ~30% sequence homology, the filaments they  
38 form and the conformational changes they induce in DNA are nearly identical (6). In some  
39 studies, it is shown that the inhibitors targeting to Rad51 can strongly inhibit the activity of  
40 RecA (7). More importantly, the deficiency of DNA repair may also increase the rate of drug  
41 resistant mutagenesis induced by the antibiotic exposure. Therefore, given that the antibiotics  
42 are a critical tool for fighting infections in cancer patients who may have compromised immune  
43 systems, it is urgent to investigate whether the suppression on RecA can influence the evolution  
44 of antibiotic resistance in the clinical anti-infection therapy.

45

46 Here, we constructed a *recA* deletion *E. coli* strain ( $\Delta recA$ ) and exposed them to a single dose  
47 of ampicillin at 50  $\mu\text{g/ml}$ . Surprisingly, we observed an unexpected superfast emergence of  
48 resistance after only 8 hours single exposure to ampicillin (Fig. 1A). Genetic rescue of the  
49  $\Delta recA$  strain with a plasmid encoding *recA* gene recovered its susceptibility to ampicillin,  
50 which shows this superfast resistance is dependent on the *recA* deletion (Fig. 1A). More  
51 importantly, this resistance, once being established, became stable and heritable, as after  
52 growing the culture continuously in an antibiotic-free medium for 7 days, they maintained the  
53 resistance ability to ampicillin (Fig. 1B).

54

55 We further show that this superfast evolution of antibiotic resistance already involves  
56 significant amounts of DNA mutations in the  $\Delta recA$  strain, which explains the stable and  
57 heritable resistance. The evolution of antibiotic resistance, from tolerance to resistance, have  
58 been reported when bacteria are exposed to antibiotics for a few weeks in *in vitro* evolutionary  
59 experiments (8) and clinical settings (9). Here, we observed the tolerance after the single  
60 exposure of 50  $\mu\text{g/ml}$  ampicillin in the wild type strain (Fig. S1A-C), and the daily intermittent  
61 treatment with the same concentration of ampicillin for two weeks caused the evolution of  
62 antibiotic resistance (Fig. S1D).

63

64 For the evolution from antibiotic tolerance to resistance in the wide type strain, the whole-  
65 genome sequencing revealed that all resistant bacteria harboured mutations at the promoter of  
66 *ampC* (Fig. S1E). In comparison, in the  $\Delta recA$  strain, DNA mutations mainly include the  
67 mutations at the promoter of *ampC* and the gene *acrB* (Fig 1C and Table S1). The mutations at

68 the promoter of gene *ampC* were accompanied with the significantly increased production of  
69  $\beta$ -lactamase (Fig. 1D). As the gene *acrB* mutations encode a major multi-drug efflux pump  
70 AcrB of gram-negative bacteria (10, 11), we also observed a multi-drug resistance to other  
71 classes of antibiotics, including the chloramphenicol and kanamycin in the  $\Delta recA$  strain (Fig.  
72 S2A and B). Treatment with 1-(1-Naphthylmethyl) piperazine (NMP), an inhibitor of the AcrB  
73 efflux pump, convinced that the gene *acrB* mutations conferred the antibiotic resistance in the  
74 gene *acrB* mutant resistant isolates, as the inhibition on AcrB restored its sensitivity to  
75 ampicillin (Fig. 1E).

76  
77 Considering the potential effect of gene duplication and amplification (GDA) on the emergence  
78 of resistance in the  $\Delta recA$  strain (12), we further validated the chromosomal gene copy number  
79 variations (CNVs) using the whole-genome sequencing and droplet digital PCR (ddPCR)  
80 methods, but no difference was detected (Fig. S3), which suggests that GDA was not associated  
81 with this emergence of antibiotic resistance.

82  
83 To further characterize this unexpected superfast evolution of antibiotic resistance, we applied  
84 a mutant prevention concentration (MPC) assay to determine the mutation frequency, and  
85 found that the single treatment of ampicillin already induced a higher mutation frequency in  
86 the  $\Delta recA$  strain, compared with that in the wild type strain (from  $10^{-9}$  to  $10^{-7}$  mutations per  
87 generation). Complementation of *recA* rescued it to a similar rate as the wild type strain (Fig.  
88 1F). As no apparent difference of MPC was found in between the wild type and the  $\Delta recA$   
89 strain without treatment (Fig. 1F), we can conclude that the mutation frequency does not  
90 naturally increase in the  $\Delta recA$  strain. These results characterize the repression of DNA repair  
91 induced evolution in the  $\Delta recA$  strain under the antibiotic exposure.

92  
93 To further study the DNA repair, we applied super-resolution imaging to pinpoint the dynamic  
94 locations of the chromosome and DNA polymerase I that participates in the repair of DNA  
95 damage (13). We observed a formation of multinucleated filaments in both the wild type and  
96 the  $\Delta recA$  strain after the 8-hour exposure to ampicillin (Fig. 2A and B). The typical  
97 filamentation may suggest a time window for bacteria to repair the DNA damage (14). However,  
98 the expression level of DNA polymerase I was significantly suppressed in the  $\Delta recA$  strain (Fig.  
99 2C and D), and the super resolution colocalization results reveal that the co-localization ratio  
100 between the chromosome and DNA polymerase I was significantly lower in the  $\Delta recA$  strain

101 compared with that in the wild type strain (Fig. 2E), suggesting the induction of DNA repair  
102 being repressed in the *ΔrecA* strain.

103

104 Because RecA is critical in the activation of SOS response that induces DNA repair, we further  
105 studied whether the superfast emergence of resistance observed in the *ΔrecA* strain has  
106 anything to do with the SOS response. To test this possibility, we used two single-gene mutants  
107 of the SOS response, *ΔlexA*, resulting in constitutive induction of the SOS response, *lexA3*  
108 where the SOS response is always switched off, and exposed them to 50 μg/ml ampicillin for  
109 8 hours. In either case, no antibiotic resistance was observed (Fig. 2F). These results confirm  
110 that the superfast emergence of antibiotic resistance bypasses the SOS system in the *ΔrecA*  
111 strain.

112

113 In short, we observed a superfast evolution of antibiotic resistance in *Escherichia coli* once  
114 RecA, the master regulator of the SOS response, being deleted. Rapid DNA mutations,  
115 featuring at the promoter of *ampC* and the gene *acrB*, underpin the superfast emergence of  
116 antibiotic resistance as well as being resistant to other classes of antibiotics. The whole process  
117 is orthogonal to the well-known SOS response. These findings suggest that the hindrance of  
118 DNA repair not only generally antagonizes cells fitness, but also provides bacteria with genetic  
119 plasticity to adapt to diverse stressful environments and can dramatically accelerate the  
120 evolution of antibiotic resistance within only a few hours, which suggests that cares should be  
121 taken in using DNA repair inhibitor to strengthen the efficacy of antibiotics. Thereby, from a  
122 clinical perspective, our finding significantly highlights the possibility that the synergistic drug  
123 combination especially in the patients with cancer treatment, while fostering the genetic  
124 instability and enhancing the genetic diversity, may lead to an even superfast evolution of  
125 antibiotic resistance in bacteria.

126

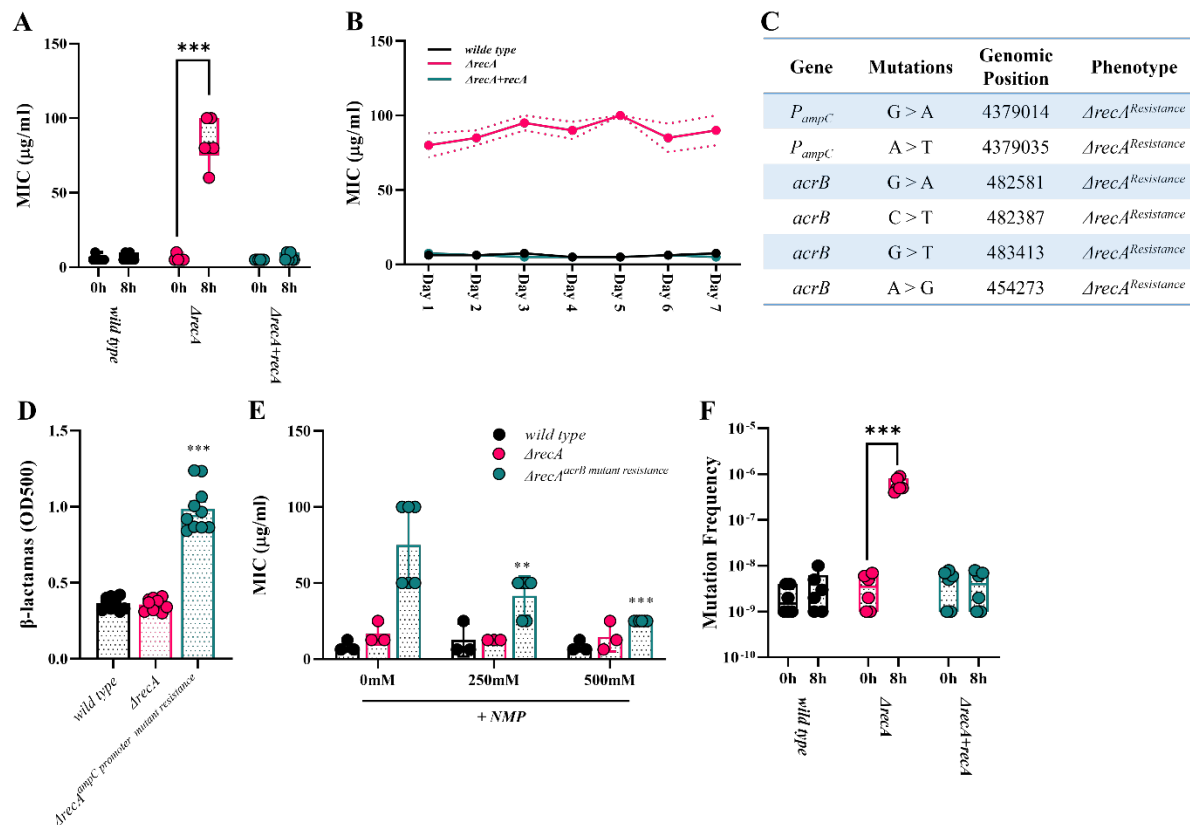

127

128 **Figure 1. A superfaster evolution of antibiotic resistance caused by the *recA* deletion. (A)**

129 The emergence of antibiotic resistance after a single 8-hour exposure to ampicillin (50 µg/ml)

130 in the *ΔrecA* strain. (B) Heritable resistance was convinced in the *ΔrecA* resistant isolates.

131 Surviving cells after the exposure to ampicillin were continuously cultured in antibiotic-free

132 media for 7 days. MIC was measured in each day. (C) Mainly detected DNA mutations

133 associated with the drug resistance in the *ΔrecA* resistant isolates. (D) Levels of β-lactamase in

134 each strain determined by the absorbance at OD500. (E) The wild type, *ΔrecA*, and ampicillin

135 exposure-induced *ΔrecA* resistant isolates were treated with NMP at 0, 250, and 500 mM for

136 12 hours. (F) The single 8-hour exposure to ampicillin (50 µg/ml) significantly increased the

137 mutation frequency in the *ΔrecA* strain compared to that of other strains. Each experiment was

138 independently repeated at least 4 times. \*  $p < 0.05$ ; \*\*  $p < 0.01$ ; \*\*\*  $p < 0.001$ .

139

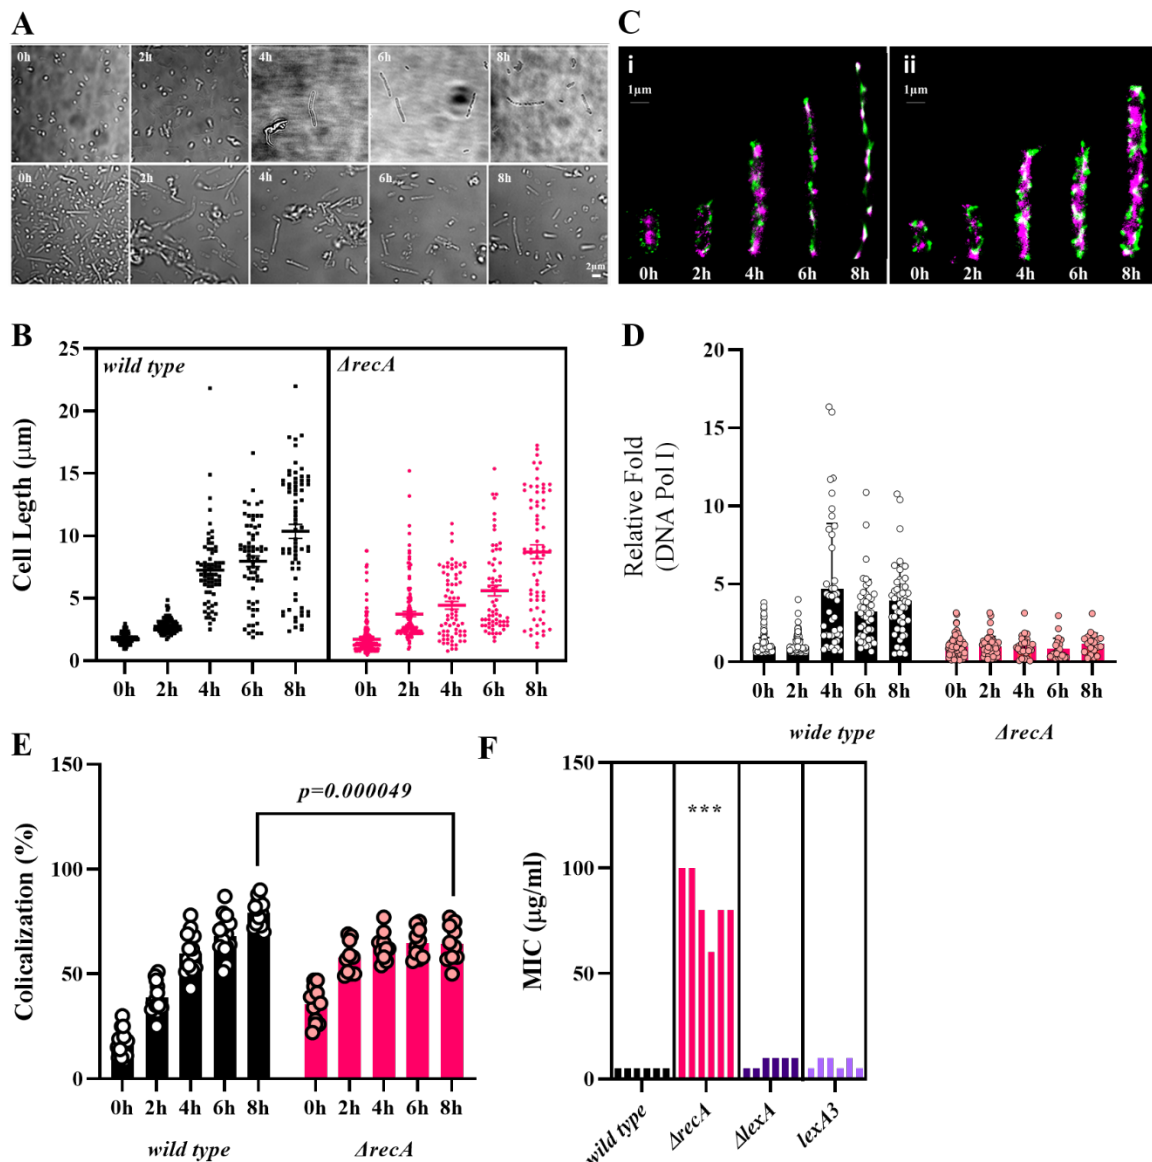

140

141 **Figure 2. The superfast evolution of antibiotic resistance in the  $\Delta recA$  strain related to the**  
 142 **hindrance of DNA repair but orthogonal to the SOS response. (A)** After the exposure to  
 143 ampicillin at 50  $\mu\text{g/ml}$  for 0, 2, 4, 6, and 8 hours, surviving cells were fixed and imaged. Top,  
 144 the wild type strain. Bottom, the  $\Delta recA$  strain. **(B)** The length of filaments counted in the wild  
 145 type (n=253) and the  $\Delta recA$  strain (n=216). **(C)** Multinucleated filaments were observed in  
 146 either (i) the wild type or (ii) the  $\Delta recA$  strain. Purple, *E. coli* chromosome. Green, DNA  
 147 polymerase I. **(D)** The relative fold of DNA polymerase I was measured in the wild type and  
 148  $\Delta recA$  strain. **(E)** The co-localization between the chromosome and DNA polymerase I was  
 149 statistically calculated. **(E)** After the exposure to ampicillin at 50  $\mu\text{g/ml}$  for 8 hours, the MICs  
 150 were measured in the wild type, the  $\Delta recA$ , the  $\Delta lexA$ , and the *lexA3* strain. This experiment  
 151 was independently repeated at least 6 times. \*  $p < 0.05$ ; \*\*  $p < 0.01$ ; \*\*\*  $p < 0.001$ .

152

## 153 **Materials and Methods**

### 154 **Bacterial strains, medium and antibiotics**

155 Bacterial strains and plasmids used in this work are described in Table S2 and Table S3. Luria-  
156 Bertani (LB) was used as broth or in agar plates. *E. coli* cells were grown on LB agar (1.5%  
157 w/v) plates at 37°C, unless stated otherwise, antibiotics were supplemented, where appropriate.  
158 Whenever possible, antibiotic stock solutions were prepared fresh before the use.

159

### 160 **Treatment with antibiotics to induce evolutionary resistance**

161 For the single exposure to antibiotic experiment, an overnight culture (0.6 ml;  $1 \times 10^9$  CFU/ml  
162 cells) was diluted 1:50 into 30 ml LB medium supplemented with antibiotics (50 µg/ml  
163 ampicillin, 1 mg/ml penicillin G, or 200 µg/ml carbenicillin) and incubated at 37°C with  
164 shaking at 250 rpm for 0, 2, 4, and 8 hours, respectively. After each treatment, the antibiotic-  
165 containing medium was removed by washing twice (20 min centrifugation at 1500 g) in fresh  
166 LB medium.

167

168 To test the capacity for tolerance, the surviving isolates were immediately used or stored at -  
169 80°C for future use. To test resistance, the surviving isolates were first resuspended in 30 ml  
170 LB medium and grown overnight at 37°C with shaking at 250 rpm. The regrown culture was  
171 then plated onto LB agar supplemented with the appropriate selective antibiotics and incubated  
172 16 hours at 37°C. Single colonies were isolated and used to test the resistance or stored at -  
173 80°C for future use.

174

175 For the intermittent antibiotic treatment experiments, an overnight culture (0.6 ml;  $1 \times 10^9$   
176 CFU/ml cells) was diluted 1:50 into 30 ml LB medium supplemented with 50 µg/ml ampicillin  
177 and incubated at 37°C with shaking at 250 rpm for 4 hours. After treatment, the antibiotic-  
178 containing medium was removed by washing twice (20 min centrifugation at 1500 g) in fresh  
179 LB medium. The surviving isolates were resuspended in 30 ml LB medium and grown  
180 overnight at 37°C with shaking at 250 rpm. The killing treatment was applied as above to the  
181 regrown culture and repeated until resistance was established.

182

### 183 **Antibiotic susceptibility testing**

184 The susceptibility of *E. coli* cells to antibiotics was measured by using minimum inhibitory  
185 concentration (MIC) testing (15).

186

187 The capacity of tolerance was measured by using the minimum duration for killing 99% of the  
188 population (MDK<sub>99</sub>) testing (16).

189

### 190 **ScanLag analysis**

191 To determine the types of tolerance observed, a ScanLag analysis was applied followed by  
192 previously reported methods (17, 18).

193

### 194 **Mutation frequency test**

195 Bacterial population mutation frequency was evaluated based on the approach of the Delbrück-  
196 Luria Fluctuation test (19).

197

### 198 **Transformation with plasmids**

199 Bacterial transformation with plasmids was followed by a reported protocol using the heat  
200 shock method (20). Plasmids used in this work are listed in the Table S3.

201

### 202 **Measurement of $\beta$ -lactamase**

203 The amount of  $\beta$ -lactamase was measured by the absorbance at OD500 followed by a previous  
204 reported method with modifications (21).

205

### 206 **Construction of deletion mutants**

207 Lambda Red recombination was used to generate various gene deletions in *E. coli* strains  
208 followed by previous reported methods with modifications (22, 23). Primers used in this work  
209 are listed in the Table S4.

210

### 211 **DNA extraction**

212 Chromosomal DNA was extracted and purified using the PureLink™ Genomic DNA mini kit  
213 (ThermoFisher Scientific). Plasmid DNA was extracted and purified using the PureLink™  
214 Quick Plasmid Miniprep kit (ThermoFisher Scientific).

215

### 216 **Whole genome sequencing**

217 The genomic sequencing was conducted following the Nextera Flex library preparation kit  
218 process (Illumina), and processed by Sangon Biotech, Shanghai, China.

219



## 220 **Droplet digital PCR (ddPCR)**

221 Genomic DNA samples were added to the Bio-Rad 2 x ddPCR supermix at amounts of 0.05  
222 ng DNA per 22  $\mu$ l ddPCR reaction, according to the ddPCR Bio-Rad user manual. Primers are  
223 used in this work are listed in Table S4. Samples were converted into droplets using a Bio-Rad  
224 QX200 droplet generator. After the droplet generation, the plate was transferred to a thermal  
225 cycler and reactions were run under the standard cycling conditions. After PCR, the plate was  
226 loaded onto the Bio-Rad QX200 Droplet Digital Reader, and data analysis was performed using  
227 Bio-Rad QuantaSoft™ software.

228

## 229 **Immunofluorescence labelling**

230 To label the bacterial chromosome, a Click-iT EdU kit was used following the manufacturer's  
231 instruction (ThermoFisher) and as described before (24). To label DNA polymerase I, the cells  
232 were blocked and permeabilized with blocking buffer (5% wt/vol bovine serum albumin  
233 [Sigma-Aldrich] and 0.5% vol/vol Triton X-100 in PBS) for 30 min and then incubated with  
234 10  $\mu$ g/ml primary antibody against the DNA polymerase I (ab188424, abcam) in blocking  
235 buffer for 60 min at room temperature. After washing with PBS three times, the cells were  
236 incubated with 2  $\mu$ g/ml fluorescently labelled secondary antibody (Alexa 647, A20006,  
237 ThermoFisher) against the primary antibody in blocking buffer for 40 min at room temperature.  
238 After washing with PBS three times, the cells were postfixed with 4% (wt/vol)  
239 paraformaldehyde in PBS for 10 min and stored in PBS before imaging.

240

## 241 **Super-resolution imaging and data analysis**

242 Super-resolution imaging was performed using the Stochastic Optical Reconstruction  
243 Microscopy (STORM) as described previously (25, 26). STORM image analysis, drift  
244 correction, image rendering, protein cluster identification and images presentation were  
245 performed using Insight3<sup>42</sup>, custom-written Matlab (2012a, MathWorks) codes, SR-Tesseler  
246 (IINS, Interdisciplinary Institute for Neuroscience) (27), and Image J (National Institutes of  
247 Health).

248

## 249 **Statistical analysis**

250 Statistical analysis was performed using GraphPad Prism v.9.0.0. All data are presented as  
251 individual values and mean or mean  $\pm$  s.e.m. A two-tailed unpaired Student's t-test using a 95%  
252 confidence interval was used to evaluate the difference between two groups. For more than two  
253 groups, a one-way ANOVA was used. A probability value of  $P < 0.05$  was considered

254 significant. Statistical significance is indicated in each figure. All remaining experiments were  
255 repeated independently at least fourth with similar results.

256

### 257 Data availability

258 Sequence data that supports the findings of this study have been deposited in GEO repository  
259 with the GEO accession numbers GSE179434.

260

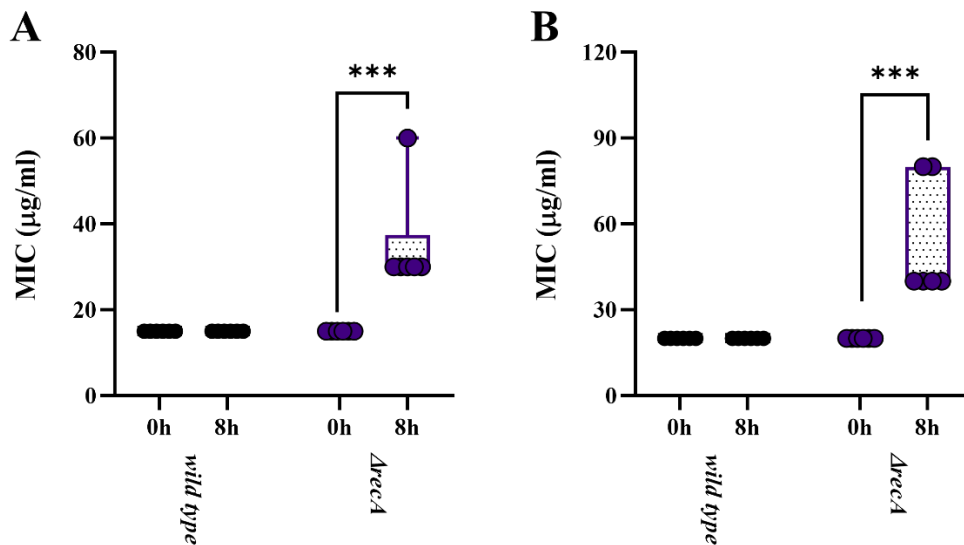

261

262 **Figure S1. The multi-drug resistance to other types of antibiotics.** After the exposure to  
263 ampicillin at 50 µg/ml for 8 hours, the surviving cells were tested for their resistance to other types of  
264 antibiotics including (A) chloramphenicol and (B) kanamycin. Each experiment was independently  
265 repeated 4 times. \*  $p < 0.05$ ; \*\*  $p < 0.01$ ; \*\*\*  $p < 0.001$ .

266

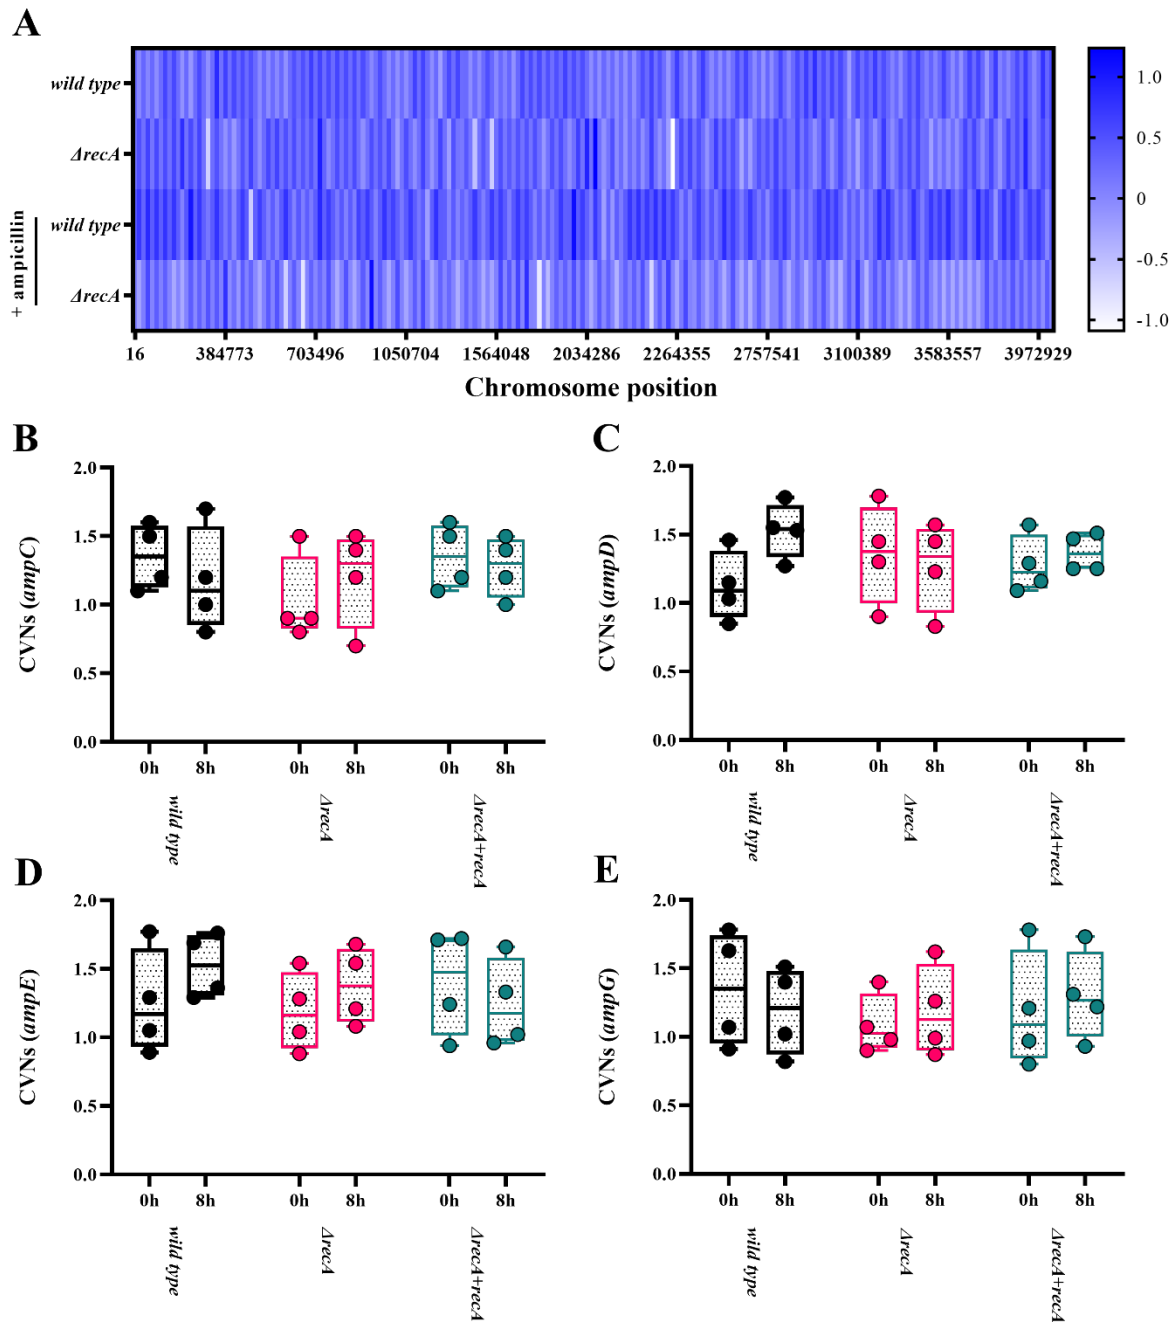

267

268 **Figure S2. The copy number variations were not changed in the  $\Delta recA$  resistant isolates.**

269 After the treatment of ampicillin at 50  $\mu\text{g/ml}$  for 8 hours, (A) the copy number variations of genes  
270 in chromosome were measured using the whole-genome sequencing method. The copy number  
271 variations of the ampicillin-resistance related genes in *E. coli* were verified using the ddPCR method,  
272 including (B) *ampC*, (C) *ampD*, (D) *ampE*, and (E) *ampG*. Each experiment was independently  
273 repeated 4 times.

274

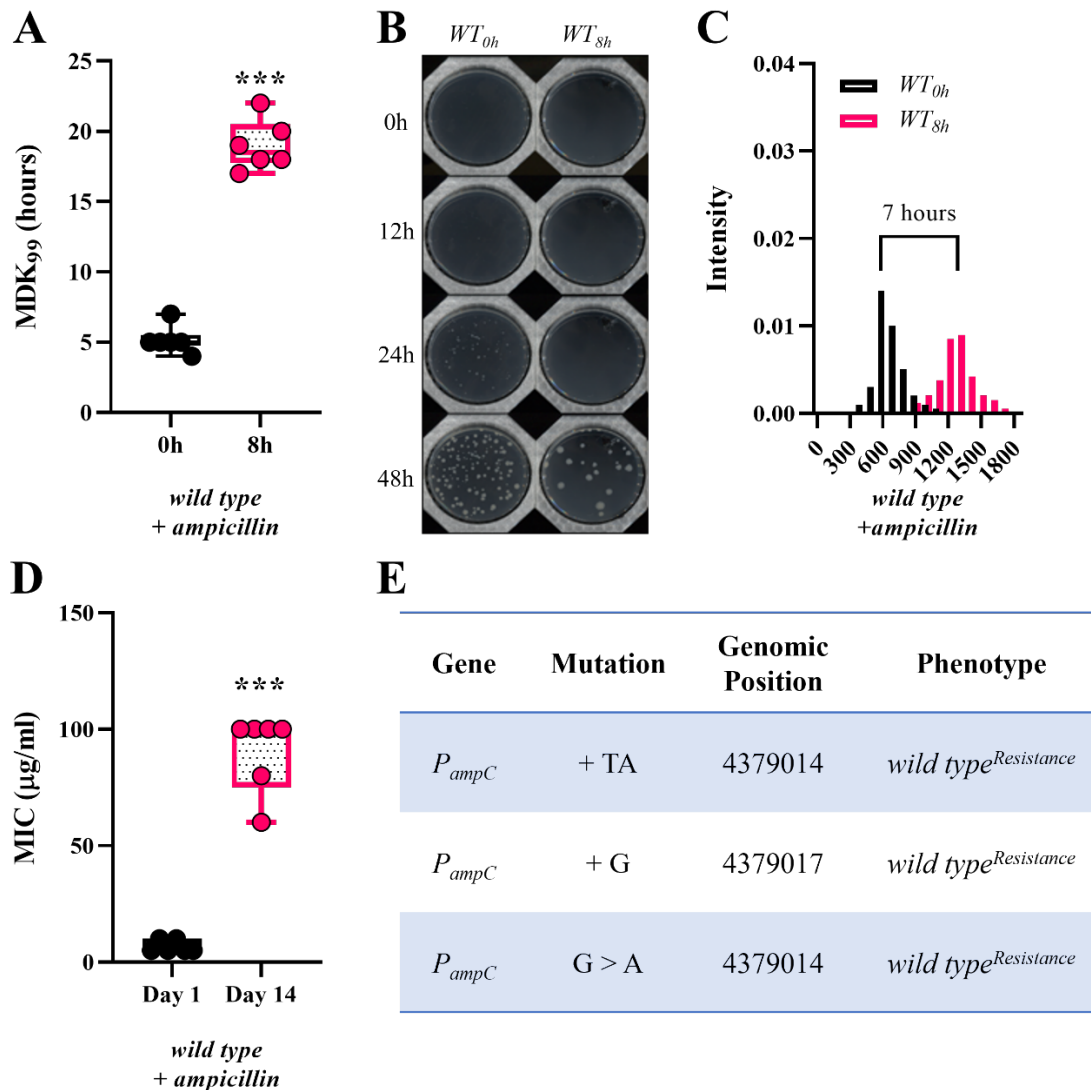

275

276 **Figure S3. The wild type strain evolved to be tolerance after a single exposure to**

277 **ampicillin, but to be resistance after an intermittent treatment with ampicillin. (A)** MDK<sub>99</sub>

278 of the wild type strain after the exposure to ampicillin at 50 µg/ml for 8 hours. **(B)** The type of

279 tolerance was defined by using the ScanLag system. The appearance and morphology of each

280 single colony were automatically monitored. **(C)** Tolerant cells had an approx. 7 hours delayed

281 appearance time showing an emergence of tolerance by lag-phase. **(D)** MICs of the wild type

282 strain after 14 day treatment with ampicillin at 50 µg/ml for 4 hours at each exposure cycle. **(E)**

283 Detected DNA mutations associated with the drug resistance in the wild type resistant isolates.

284 Each experiment was independently repeated 6 times. \*  $p < 0.05$ ; \*\*  $p < 0.01$ ; \*\*\*  $p < 0.001$ .

285

286

287

288

289 **Table S1. Additional mutations detected in the *ΔrecA* resistant isolates.**

| Gene             | Mutation          | Genomic Position | Phenotype                          |
|------------------|-------------------|------------------|------------------------------------|
| <i>crl</i>       | G > A             | 257908           | <i>ΔrecA</i> <sup>Resistance</sup> |
| <i>stfE</i>      | A>AGGTTTTTCGAGAGC | 1209618          | <i>ΔrecA</i> <sup>Resistance</sup> |
| <i>rrlH</i>      | CATG > C          | 226298           | <i>ΔrecA</i> <sup>Resistance</sup> |
| <i>rrsC</i>      | G > GTGTT         | 3942261          | <i>ΔrecA</i> <sup>Resistance</sup> |
| <i>rrlC</i>      | A > G             | 3945857          | <i>ΔrecA</i> <sup>Resistance</sup> |
| <i>araC</i>      | C > T             | 70434            | <i>ΔrecA</i> <sup>Resistance</sup> |
| <i>nlpA</i>      | C > T             | 3839895          | <i>ΔrecA</i> <sup>Resistance</sup> |
| <i>acnB</i>      | G > A             | 132324           | <i>ΔrecA</i> <sup>Resistance</sup> |
| <i>pitA</i>      | T > A             | 3637975          | <i>ΔrecA</i> <sup>Resistance</sup> |
| <i>ydfR,ydfJ</i> | G > T             | 1640125          | <i>ΔrecA</i> <sup>Resistance</sup> |
| <i>arpB</i>      | T >INDEL          | 1803602          | <i>ΔrecA</i> <sup>Resistance</sup> |
| <i>ftsI</i>      | A > C             | 93006            | <i>ΔrecA</i> <sup>Resistance</sup> |

290

291 **Table S2. Strains used in this study.**

| Strain                                 | Relevant Genotype                                                        | Parent strain | Source/technique |
|----------------------------------------|--------------------------------------------------------------------------|---------------|------------------|
| DH5α                                   | -                                                                        | -             | Lab stock        |
| <i>E. coli</i> K-12                    | <i>recA</i> <sup>+</sup> <i>lexA</i> <sup>+</sup>                        | -             | Lab stock        |
| LZ101                                  | <i>lexA</i> <sup>+</sup> <i>ΔrecA::Tet</i>                               | K-12          | This study       |
| <i>recA</i> <sup>complementation</sup> | <i>lexA</i> <sup>+</sup> <i>ΔrecA::Tet</i> , pJM1071- <i>recA</i>        | LZ101         | This study       |
| <i>recA</i> <sup>OE</sup>              | <i>recA</i> <sup>+</sup> <i>lexA</i> <sup>+</sup> , pJM1071- <i>recA</i> | K-12          | This study       |
| RW1570                                 | <i>recA</i> <sup>+</sup> <i>lexA3</i>                                    | K-12          | Lab stock        |
| EAW26                                  | <i>recA</i> <sup>+</sup> <i>ΔlexA::Cm</i>                                | K-12          | Lab stock        |

292

293 **Table S3. Plasmids used in this study.**

| Plasmid              | Description                                                                                 | Source     |
|----------------------|---------------------------------------------------------------------------------------------|------------|
| pJM1071- <i>recA</i> | Gene <i>recA</i> cloned into the multiple cloning site of pJM1071, spectinomycin resistance | This study |
| pKD46                | Helper plasmid for Lambda RED recombination                                                 | Lab stock  |

294

295

296

297

298 **Table S4. Primers used in this study.**

| Name                        | Sequence                                                                            |
|-----------------------------|-------------------------------------------------------------------------------------|
| <i>recA-FWD</i>             | AAAAAAGCAAAAGGGCCGCAGATGCGACCCTTGTGTATCAAACAAGA<br>CGAGAAACGAGAGAGGATGCTCAC         |
| <i>recA-REV</i>             | CAACAGAACATATTGACTATCCGGTATTACCCGGCATGACAGGAGTAA<br>AAGACGTCTAAGAAACCATTATTATCATGAC |
| <i>ampC-FWD</i>             | TTACTTTACCTGGGGCTATG                                                                |
| <i>ampC-REV</i>             | GTGGGATCGCTTAACTTGA                                                                 |
| <i>ampD-FWD</i>             | GATCGACGCATTATTCCTG                                                                 |
| <i>ampD-REV</i>             | CGAAAGGACATACTGGACTA                                                                |
| <i>ampE-FWD</i>             | GGCGTGACTTTTTTACTGTT                                                                |
| <i>ampE-REV</i>             | ACTTTACCTGCGCCAATAC                                                                 |
| <i>ampG-FWD</i>             | CATTGGTTTCTTCTCTCTGGT                                                               |
| <i>ampG-REV</i>             | AATGGCGACTAATAACAGGA                                                                |
| <i>cysG-FWD</i>             | CGAAAACTTGAATCACTGC                                                                 |
| <i>cysG-REV</i>             | AATGGCTTTCTGATCGTT G                                                                |
| <i>P<sub>ampC</sub>-FWD</i> | GTGCGATGCACAATATCGTTG                                                               |
| <i>P<sub>ampC</sub>-REV</i> | TCCTGTTCTGATGATCGTTC                                                                |

299

## 300 Reference

- 301 1. Xuan Li and Wolf-Dietrich Heyer. Homologous recombination in DNA repair and DNA  
302 damage tolerance. *Cell Research*. **18**, 99-113 (2008).
- 303 2. PR Bianco, RB Tracy, SC Kowalczykowski. DNA strand exchange proteins: a biochemical  
304 and physical comparison. *Front Biosci*. **3**, D570-603 (1998).
- 305 3. P Sung, L Krejci, S Van Komen, MG Sehorn, Rad51 recombinase and recombination  
306 mediators. *J Biol Chem*. **278**, 42729-42732 (2003).
- 307 4. Erik Laurini, Domenico Marson, Alice Fermeglia, Suzana Aulic, Maurizio Fermeglia,  
308 Sabrina Pricl. Role of Rad51 and DNA repair in cancer: A molecular perspective.  
309 *Pharmacology & Therapeutics*. **208**, 107492 (2020).
- 310 5. Ryan Lynch, Johanna Bendell, Ranjana Advani, et al. First-in-human phase I/II study of  
311 CYT-0851, a first-in-class inhibitor of RAD51-mediated homologous recombination in  
312 patients with advanced solid and hematologic cancers. *Journal of Clinical Oncology*. **39**, 15  
313 (2021).
- 314 6. T Ogawa, X Yu, A Shinohara, EH Egelman, Similarity of the yeast RAD51 filament to the  
315 bacterial RecA filament. *Science* **259**, 1896-1899 (1993).

- 316 7. Fei Huang, Nuzhat Motlekar, Chelsea Burgwin, et al. Identification of specific inhibitors of  
317 human RAD51 recombinase using high-throughput screening. *ACS Chem Biol.* **6**, 628-635  
318 (2011).
- 319 8. Irit Levin-Reisman et al. Antibiotic Tolerance Facilitates the Evolution of Resistance.  
320 *Science.* **355**, 826-830 (2017).
- 321 9. Jiafeng Liu et al. Effect of Tolerance on The Evolution of Antibiotic Resistance Under Drug  
322 Combinations. *Science.* **367**, 200-204 (2020).
- 323 10. Jessica M. A. Blair et al. Molecular Mechanisms of Antibiotic Resistance. *Nature Reviews*  
324 *Microbiology.* **13**, 42-51 (2015).
- 325 11. Imane El Meouche, Mary J. Dunlop. Heterogeneity in Efflux Pump Expression Predisposes  
326 Antibiotic-Resistant Cells to Mutation. *Science.* **362**, 686-690 (2018).
- 327 12. Linus Sandegren, Dan I. Andersson. Bacterial Gene Amplification: Implications for the  
328 Evolution of Antibiotic Resistance. *Nature Reviews Microbiology.* **7**, 578-588 (2009).
- 329 13. Marilyn Monk, Michael Peacey, Julian D. Gross. Repair of Damage Induced By Ultraviolet  
330 Light in DNA Polymerase-Defective *Escherichia Coli* Cells. *Journal of Molecular Biology.*  
331 **58**, 623-624 (1971).
- 332 14. Sheryl S Justice, David A Hunstad, Lynette Cegelski, Scott J Hultgren. Morphological  
333 Plasticity as a Bacterial Survival Strategy. *Nature Review Microbiology.* **6**, 162-168 (2008).
- 334 15. Eric M. Scholar, William B. Pratt. *The Antimicrobial Drugs*. Oxford University Press.
- 335 16. Asher Brauner, Noam Shores, Ofer Fridman, Nathalie Q. Balaban. An Experimental  
336 Framework for Quantifying Bacterial Tolerance. *Biophysical Journal.* **112**, 2664-2671  
337 (2017).
- 338 17. Irit Levin-Reisman et al. Automated Imaging with ScanLag Reveals Previously  
339 Undetectable Bacterial Growth Phenotypes. *Nature Methods.* **7**, 737-739 (2010).
- 340 18. Irit Levin-Reisman, Ofer Fridman, Nathalie Q Balaban. Scanlag: High-Throughput  
341 Quantification of Colony Growth and Lag Time. *J. Vis. Exp.* **89**, 51456 (2014).
- 342 19. S E Luria, M Delbrück. Mutations of Bacteria from Virus Sensitivity to Virus Resistance.  
343 *Genetics.* **6**, 491-511 (1943).
- 344 20. JoVe Science Education Database. Basic Methods in Cellular and Molecular Biology.  
345 Bacterial Transformation: The Heat Shock Method. *JoVE*, Cambridge, MA, (2021).
- 346 21. Hak Suk Chung et al. Rapid  $\beta$ -lactam-induced lysis requires successful assembly of the cell  
347 division machinery. *PNAS.* **106**, 21872-21877 (2009).
- 348 22. Kirill A. Datsenko, Barry L. Wanner. One-Step Inactivation of Chromosomal Genes in  
349 *Escherichia Coli* K-12 Using PCR Products. *Proc Natl Acad Sci.* **97**, 6640-6645 (2000).

- 350 23. Tomoya Baba et al. Construction of *Escherichia Coli* K-12 In-Frame, Single-Gene  
351 Knockout Mutants: The Keio Collection. *Mol Syst Biol*, **2**, 2006.0008 (2006).
- 352 24. Qian Peter Su et al. Superresolution Imaging Reveals Spatiotemporal Propagation of  
353 Human Replication Foci Mediated By CTCF-Organized Chromatin Structures. *Proceedings*  
354 *of the National Academy of Sciences*. **117**, 15036-15046 (2020).
- 355 25. Guangxi Wang et al., PTEN Regulates RPA1 and Protects DNA Replication Forks. *Cell*  
356 *Res.* **25**, 1189-1204 (2015).
- 357 26. Bo Huang, Wenqin Wang, Mark Bates, Xiaowei Zhuang, Three-Dimensional Super-  
358 Resolution Imaging by Stochastic Optical Reconstruction Microscopy. *Science*. **319**, 810-  
359 813 (2008).
- 360 27. Florian Levet et al., SR-tesseler: A Method to Segment And Quantify Localization-Based  
361 Super-Resolution Microscopy Data. *Nat. Methods*. **12**, 1065–1071 (2015).
