# Supplementary material for: Fast Evolution of SOS-Independent Multi-Drug Resistance in Bacteria
Source: bioRxiv preprint, doi:10.1101/2022.03.29.486198, version 6 (2025-06-13)
Supplement: Table S1 [file 486198_file09.docx]

**Table S2. Strains used in this study**

| **Strain** | **Relevant Genotype** | **Parent strain** | **Source** |
| --- | --- | --- | --- |
| DH5α | - | - | Lab stock |
| *E. coli* MG1655 | *recA+ lexA+* | - | Lab stock |
| RW1570 | *recA+ lexA3* | MG1655 | Lab stock |
| JW0612-1 | *recA+ lexA+ ΔcitB* | MG1655 | Keio Collection |
| JW0611-1 | *recA+ lexA+ ΔcitA* | MG1655 | Keio Collection |
| JW1134-1 | *recA+ lexA+ Δymfm* | MG1655 | Keio Collection |
| JW0059-1 | *recA+ lexA+ ΔpolB* | MG1655 | Keio Collection |
| JW0221-1 | *recA+ lexA+ ΔdinB* | MG1655 | Keio Collection |
| RW120 | *recA+ lexA+ΔumuDC* | MG1655 | Lab stock |
| EAW13 | *recA+ lexA+ΔsulA* | MG1655 | Lab stock |
| JW2669-1 | *lexA+ ΔrecA* | MG1655 | Keio Collection |
