# Supplementary material for: Fast Evolution of SOS-Independent Multi-Drug Resistance in Bacteria
Source: bioRxiv preprint, doi:10.1101/2022.03.29.486198, version 6 (2025-06-13)
Supplement: Table S3 [file 486198_file11.docx]

**Table S4. Primers used in this study**

| **Name** | **Sequence** | **Function** |
| --- | --- | --- |
| *recA-FWD* | AAAAAAGCAAAAGGGCCGCAGATGCGACCCTTGTGTATCAAACAAGACGAGAAACGAGAGAGGATGCTCAC | Construction of *recA* deletion mutant |
| *recA-REV* | CAACAGAACATATTGACTATCCGGTATTACCCGGCATGACAGGAGTAAAAGACGTCTAAGAAACCATTATTATCATGAC |
