# Supplementary material for: Fast Evolution of SOS-Independent Multi-Drug Resistance in Bacteria
Source: bioRxiv preprint, doi:10.1101/2022.03.29.486198, version 6 (2025-06-13)
Supplement: Table S4 [file 486198_file12.docx]

**Table S1. Other mutations detected in the *ΔrecA* resistant isolates**

| **Gene** | **Mutation** | **Genomic Position** | **Animo Acid Changes** |
| --- | --- | --- | --- |
| *stfE* | A>AGGTTTTCGAGAGC | 1209618 | p.Val13fs |
| *puuC* | T > G | 1363695 | p.Phe318Cys |
| *cpxA* | T > C | 4104711 | p.Thr89Ala |
